# Supplementary material for: Role of colonic microbiota in the pathogenesis of ulcerative colitis
Source: Springer Nature journal article supplement (doi:10.1186/s12876-019-0930-3), 2019-01-14
Supplement: MOESM1 [file 16396282]

**Supplementary file 1. CO-MO(Genus level ) Metastat analysis**

| Taxa                                                                                                         | mean.C<br>O.                | variance.<br>CO.             | standard<br>.error.C<br>O.   | mean.M<br>O.                | variance.<br>MO.             | standard<br>.error.M<br>O.   | p.value                      | q.v<br>alu<br>e            |
|--------------------------------------------------------------------------------------------------------------|-----------------------------|------------------------------|------------------------------|-----------------------------|------------------------------|------------------------------|------------------------------|----------------------------|
| k_Bacteria;p_Bacteroidetes;c_Bacteroidia;o<br>_Bacteroidales;f_Rikenellaceae;g_Alistipes                     | 0.09217<br>9909722<br>8342  | 0.00082<br>1157249<br>999059 | 0.00906<br>1772729<br>43357  | 0.01074<br>5502167<br>2486  | 0.00010<br>9719987<br>929871 | 0.00370<br>3376633<br>72683  | 0.00099<br>9000999<br>000999 | 0.042583<br>3361015<br>169 |
| k_Bacteria;p_Firmicutes;c_Erysipelotrichia;o<br>_Erysipelotrichales;f_Erysipelotrichaceae;g_<br>Turicibacter | 0.00252<br>8762454<br>82506 | 2.28313<br>0634354<br>05e-06 | 0.00047<br>7821162<br>607314 | 0.01842<br>2381578<br>9401  | 0.00015<br>2079386<br>07379  | 0.00436<br>0037070<br>8543   | 0.00099<br>9000999<br>000999 | 0.042583<br>3361015<br>169 |
| k_Bacteria;p_Bacteroidetes;c_Bacteroidia;o<br>_Bacteroidales;f_Prevotellaceae;g_Alloprev<br>otella           | 0.04008<br>6683336<br>4502  | 0.00050<br>9583522<br>418577 | 0.00713<br>8511906<br>68319  | 0.00876<br>0890904<br>63499 | 5.27191<br>1650623<br>36e-05 | 0.00256<br>7078020<br>48929  | 0.00099<br>9000999<br>000999 | 0.042583<br>3361015<br>169 |
| k_Bacteria;p_Firmicutes;c_Clostridia;o_Clo<br>stridiales;f_Lachnospiraceae;g_Acetatifactor                   | 0.00333<br>3960261<br>55412 | 6.79246<br>4284493<br>67e-06 | 0.00082<br>4164078<br>596833 | 0.02381<br>8841909<br>4337  | 0.00012<br>0580845<br>713174 | 0.00388<br>2345388<br>31191  | 0.00099<br>9000999<br>000999 | 0.042583<br>3361015<br>169 |
| k_Bacteria;p_Firmicutes;c_Clostridia;o_Clo<br>stridiales;f_Lachnospiraceae;g_Roseburia                       | 0.05317<br>2212196<br>6488  | 0.00077<br>4204258<br>637177 | 0.00879<br>8887762<br>87763  | 0.00430<br>1393952<br>02664 | 2.89903<br>4196933<br>84e-05 | 0.00190<br>3626209<br>67649  | 0.00099<br>9000999<br>000999 | 0.042583<br>3361015<br>169 |
| k_Bacteria;p_Firmicutes;c_Clostridia;o_Clo<br>stridiales;f_Ruminococcaceae;g_Ruminococ<br>cus                | 0.02611<br>4110211<br>373   | 0.00029<br>7308613<br>905474 | 0.00545<br>2601341<br>61185  | 0.00155<br>2696955<br>415   | 3.56427<br>3181270<br>34e-06 | 0.00066<br>7483443<br>733845 | 0.00099<br>9000999<br>000999 | 0.042583<br>3361015<br>169 |
| k_Bacteria;p_Proteobacteria;c_Alphaproteo<br>bacteria;o_Rhodospirillales;f_Acetobacterac                     | 0<br>0                      | 0<br>0                       | 0<br>0                       | 0.01436<br>6222642          | 0.00042<br>7803174           | 0.00731<br>2687386           | 0.00099<br>9000999           | 0.042583<br>3361015        |

|                                                                                                          |         |         |         |         |         |         |         |          |
|----------------------------------------------------------------------------------------------------------|---------|---------|---------|---------|---------|---------|---------|----------|
| eae;g_Acetobacter                                                                                        |         |         |         | 0816    | 506014  | 53936   | 000999  | 169      |
| k_Bacteria;p_Firmicutes;c_Clostridia;o_Clostridiales;f_Lachnospiraceae;g_Dorea                           | 0.00014 | 1.32931 | 3.64597 | 0.00121 | 1.04565 | 0.00036 | 0.00099 | 0.042583 |
|                                                                                                          | 5529217 | 1765121 | 2799022 | 1831927 | 0741344 | 1533321 | 9000999 | 3361015  |
|                                                                                                          | 880315  | 3e-08   | 65e-05  | 68812   | 21e-06  | 656562  | 000999  | 169      |
| k_Bacteria;p_Firmicutes;c_Clostridia;o_Clostridiales;f_Lachnospiraceae;g_Marvinbryantia                  | 0.00651 | 1.89586 | 0.00137 | 0.00028 | 1.44655 | 0.00013 | 0.00099 | 0.042583 |
|                                                                                                          | 7697744 | 0820933 | 6902618 | 6285860 | 3101509 | 4469006 | 9000999 | 3361015  |
|                                                                                                          | 79074   | 91e-05  | 53695   | 813824  | 55e-07  | 722253  | 000999  | 169      |
| k_Bacteria;p_Proteobacteria;c_Alphaproteobacteria;o_Rhodospirillales;f_Rhodospirillaceae;g_Thalassospira | 0.00293 | 3.53386 | 0.00059 | 0.00019 | 1.59501 | 0.00014 | 0.00099 | 0.042583 |
|                                                                                                          | 2710296 | 4497986 | 4463161 | 8945521 | 5718797 | 1200908 | 9000999 | 3361015  |
|                                                                                                          | 35925   | 09e-06  | 010511  | 794757  | 71e-07  | 22998   | 000999  | 169      |
| k_Bacteria;p_Firmicutes;c_Erysipelotrichia;o_Erysipelotrichales;f_Erysipelotrichaceae;g_Holdemania       | 2.11841 | 2.03919 | 1.42800 | 0.00039 | 1.53214 | 0.00013 | 0.00099 | 0.042583 |
|                                                                                                          | 6000202 | 5406913 | 3994011 | 5704073 | 5291341 | 8390086 | 9000999 | 3361015  |
|                                                                                                          | 73e-05  | 56e-09  | 77e-05  | 165591  | 99e-07  | 862372  | 000999  | 169      |
| k_Bacteria;p_Firmicutes;c_Bacilli;o_Bacillales;f_Paenibacillaceae;g_Aneurinibacillus                     | 0       | 0       | 0       | 0.00164 | 5.53631 | 0.00083 | 0.00099 | 0.042583 |
|                                                                                                          |         |         |         | 9981450 | 9543393 | 1889381 | 9000999 | 3361015  |
|                                                                                                          |         |         |         | 58877   | 33e-06  | 422895  | 000999  | 169      |
| k_Bacteria;p_Firmicutes;c_Clostridia;o_Clostridiales;f_Caldicoprobacteraceae;g_Caldicoprobacter          | 0       | 0       | 0       | 0.00132 | 3.28197 | 0.00064 | 0.00099 | 0.042583 |
|                                                                                                          |         |         |         | 5168065 | 6986782 | 0505365 | 9000999 | 3361015  |
|                                                                                                          |         |         |         | 12972   | 36e-06  | 588607  | 000999  | 169      |
| k_Bacteria;p_Firmicutes;c_Clostridia;o_Clostridiales;f_Syntrophomonadaceae;g_Dethiobacter                | 0       | 0       | 0       | 0.00067 | 8.54572 | 0.00032 | 0.00099 | 0.042583 |
|                                                                                                          |         |         |         | 0187236 | 1020469 | 6835605 | 9000999 | 3361015  |
|                                                                                                          |         |         |         | 908555  | 12e-07  | 092016  | 000999  | 169      |
| k_Bacteria;p_Firmicutes;c_Clostridia;o_Clostridiales;f_Gracilibacteraceae;g_Gracilibacter                | 0       | 0       | 0       | 0.00067 | 9.04364 | 0.00033 | 0.00099 | 0.042583 |
|                                                                                                          |         |         |         | 3114589 | 7191847 | 6222530 | 9000999 | 3361015  |
|                                                                                                          |         |         |         | 106748  | 22e-07  | 324918  | 000999  | 169      |

|                                                                                                                    |         |         |         |         |         |         |         |          |
|--------------------------------------------------------------------------------------------------------------------|---------|---------|---------|---------|---------|---------|---------|----------|
| k_Bacteria;p_Firmicutes;c_Clostridia;o_Clostridiales;f_Clostridiaceae_1;g_Candidatus_Arthromitus                   | 0.00048 | 1.49962 | 0.00012 | 1.33926 | 1.43489 | 1.33926 | 0.00099 | 0.042583 |
|                                                                                                                    | 4435414 | 3309688 | 2459107 | 1798896 | 7732786 | 1798896 | 9000999 | 3361015  |
|                                                                                                                    | 541867  | 65e-07  | 855996  | 45e-05  | 68e-09  | 45e-05  | 000999  | 169      |
| k_Bacteria;p_Firmicutes;c_Clostridia;o_Clostridiales;f_Family_XI;g_Sedimentibacter                                 | 0       | 0       | 0       | 0.00056 | 6.06196 | 0.00027 | 0.00099 | 0.042583 |
|                                                                                                                    |         |         |         | 3334213 | 1966913 | 5271728 | 9000999 | 3361015  |
|                                                                                                                    |         |         |         | 836161  | 93e-07  | 636313  | 000999  | 169      |
| k_Bacteria;p_Firmicutes;c_Clostridia;o_Clostridiales;f_Family_XIV;g_Anaerobranca                                   | 0       | 0       | 0       | 0.00047 | 7.30064 | 0.00030 | 0.00099 | 0.042583 |
|                                                                                                                    |         |         |         | 8347727 | 7192636 | 2089539 | 9000999 | 3361015  |
|                                                                                                                    |         |         |         | 755804  | 81e-07  | 554021  | 000999  | 169      |
| k_Bacteria;p_Firmicutes;c_Clostridia;o_Clostridiales;f_Syntrophomonadaceae;g_Syntrophomonas                        | 0       | 0       | 0       | 0.00031 | 2.15526 | 0.00016 | 0.00099 | 0.042583 |
|                                                                                                                    |         |         |         | 9444891 | 3352349 | 4136503 | 9000999 | 3361015  |
|                                                                                                                    |         |         |         | 001596  | 87e-07  | 8752    | 000999  | 169      |
| k_Bacteria;p_Firmicutes;c_Clostridia;o_Clostridiales;f_Ruminococcaceae;s_bacterium_enrichment_culture_clone_BBMC-9 | 0       | 0       | 0       | 0.00027 | 1.45408 | 0.00013 | 0.00099 | 0.042583 |
|                                                                                                                    |         |         |         | 2857184 | 4714004 | 4818614 | 9000999 | 3361015  |
|                                                                                                                    |         |         |         | 206236  | 32e-07  | 905561  | 000999  | 169      |
| k_Bacteria;p_Proteobacteria;c_Betaproteobacteria;o_Burkholderiales;f_Comamonadaceae;g_Delftia                      | 0       | 0       | 0       | 6.26532 | 5.21842 | 2.55402 | 0.00099 | 0.042583 |
|                                                                                                                    |         |         |         | 9929112 | 8122064 | 3326553 | 9000999 | 3361015  |
|                                                                                                                    |         |         |         | 05e-05  | 52e-09  | 74e-05  | 000999  | 169      |
| k_Bacteria;p_Actinobacteria;c_Actinobacteriales;o_Bifidobacteriales;f_Bifidobacteriaceae;g_Gardnerella             | 0       | 0       | 0       | 0.00036 | 7.55959 | 0.00030 | 0.00099 | 0.042583 |
|                                                                                                                    |         |         |         | 3808409 | 9214730 | 7400374 | 9000999 | 3361015  |
|                                                                                                                    |         |         |         | 212514  | 26e-07  | 404665  | 000999  | 169      |
| k_Bacteria;p_Firmicutes;c_Clostridia;o_Clostridiales;f_Peptococcaceae;g_Dehalobacter                               | 0       | 0       | 0       | 0.00015 | 6.81841 | 9.23201 | 0.00099 | 0.042583 |
|                                                                                                                    |         |         |         | 7412939 | 1888470 | 7580457 | 9000999 | 3361015  |
|                                                                                                                    |         |         |         | 50675   | 31e-08  | 64e-05  | 000999  | 169      |
| k_Bacteria;p_Proteobacteria;c_Deltaproteobacteria                                                                  | 0       | 0       | 0       | 8.46196 | 1.31004 | 4.04667 | 0.00099 | 0.042583 |

|                                                                                                        |   |   |   |         |         |         |         |          |
|--------------------------------------------------------------------------------------------------------|---|---|---|---------|---------|---------|---------|----------|
| bacteria;o_Desulfovibrionales;f_Desulfovibrionaceae;g_Desulfovibrio                                    |   |   |   | 6185148 | 5512371 | 3807541 | 9000999 | 3361015  |
|                                                                                                        |   |   |   | 4e-05   | 21e-08  | 21e-05  | 000999  | 169      |
| k_Bacteria;p_Firmicutes;c_Clostridia;o_Clostridiales;f_Lachnospiraceae;g_Cellulosilyticum              | 0 | 0 | 0 | 0.00019 | 7.08457 | 9.41048 | 0.00099 | 0.042583 |
|                                                                                                        |   |   |   | 0856790 | 3939953 | 2147553 | 9000999 | 3361015  |
|                                                                                                        |   |   |   | 151943  | 91e-08  | 54e-05  | 000999  | 169      |
| k_Bacteria;p_Firmicutes;c_Clostridia;o_Clostridiales;f_Clostridiaceae_1;g_Clostridium_sensu_stricto_12 | 0 | 0 | 0 | 0.00010 | 2.41899 | 5.49885 | 0.00099 | 0.042583 |
|                                                                                                        |   |   |   | 3720737 | 1842594 | 4247244 | 9000999 | 3361015  |
|                                                                                                        |   |   |   | 370813  | 88e-08  | 24e-05  | 000999  | 169      |
| k_Bacteria;p_Firmicutes;c_Clostridia;o_Clostridiales;f_Ruminococcaceae;g_Acetivibrio                   | 0 | 0 | 0 | 0.00012 | 3.83223 | 6.92119 | 0.00099 | 0.042583 |
|                                                                                                        |   |   |   | 4791582 | 3154595 | 3136478 | 9000999 | 3361015  |
|                                                                                                        |   |   |   | 980224  | 18e-08  | 69e-05  | 000999  | 169      |
| k_Bacteria;p_Firmicutes;c_Bacilli;o_Lactobacillales;f_Streptococcaceae;g_Lactococcus                   | 0 | 0 | 0 | 0.00019 | 1.43655 | 0.00013 | 0.00099 | 0.042583 |
|                                                                                                        |   |   |   | 3829967 | 6961155 | 4003589 | 9000999 | 3361015  |
|                                                                                                        |   |   |   | 594806  | 49e-07  | 558055  | 000999  | 169      |
| k_Bacteria;p_Firmicutes;c_Bacilli;o_Bacillales;f_Pasteuriaceae;g_Pasteuria                             | 0 | 0 | 0 | 6.34362 | 1.02327 | 3.57644 | 0.00099 | 0.042583 |
|                                                                                                        |   |   |   | 5916636 | 4251365 | 0708591 | 9000999 | 3361015  |
|                                                                                                        |   |   |   | 83e-05  | 39e-08  | 08e-05  | 000999  | 169      |
| k_Bacteria;p_Actinobacteria;c_Coriobacteriia;o_Coriobacteriales;f_Coriobacteriaceae;g_Atopobium        | 0 | 0 | 0 | 6.13118 | 7.86221 | 3.13492 | 0.00099 | 0.042583 |
|                                                                                                        |   |   |   | 4046816 | 9129051 | 8055205 | 9000999 | 3361015  |
|                                                                                                        |   |   |   | 05e-05  | 9e-09   | 55e-05  | 000999  | 169      |
| k_Bacteria;p_Firmicutes;c_Clostridia;o_Thermoanaerobacterales;f_Thermoanaerobacteraceae;g_Gelria       | 0 | 0 | 0 | 8.30456 | 1.50022 | 4.33045 | 0.00099 | 0.042583 |
|                                                                                                        |   |   |   | 9343339 | 4290152 | 0741771 | 9000999 | 3361015  |
|                                                                                                        |   |   |   | 15e-05  | 59e-08  | 28e-05  | 000999  | 169      |
| k_Bacteria;p_Firmicutes;c_Clostridia;o_Clostridiales;f_Peptococcaceae;g_Desulfitobact                  | 0 | 0 | 0 | 3.64173 | 3.84598 | 2.19259 | 0.00099 | 0.042583 |
|                                                                                                        |   |   |   | 9925654 | 8534524 | 7926696 | 9000999 | 3361015  |

|                                                                                                             |   |   |   |         |         |         |         |          |
|-------------------------------------------------------------------------------------------------------------|---|---|---|---------|---------|---------|---------|----------|
| erium                                                                                                       |   |   |   | 65e-05  | 21e-09  | 84e-05  | 000999  | 169      |
| k_Bacteria;p_Firmicutes;c_Clostridia;o_Clostridiales;f_Peptococcaceae;g_Cryptanaerobacter                   | 0 | 0 | 0 | 6.38726 | 9.18448 | 3.38830 | 0.00099 | 0.042583 |
|                                                                                                             |   |   |   | 4821984 | 8240198 | 4930234 | 9000999 | 3361015  |
|                                                                                                             |   |   |   | 32e-05  | 76e-09  | 06e-05  | 000999  | 169      |
| k_Bacteria;p_Firmicutes;c_Clostridia;o_Clostridiales;f_Clostridiaceae_1;g_Clostridium_sensu_stricto_6       | 0 | 0 | 0 | 5.93154 | 1.00351 | 3.54173 | 0.00099 | 0.042583 |
|                                                                                                             |   |   |   | 5098223 | 2633730 | 7980374 | 9000999 | 3361015  |
|                                                                                                             |   |   |   | 68e-05  | 11e-08  | 37e-05  | 000999  | 169      |
| k_Bacteria;p_Firmicutes;c_Clostridia;o_Clostridiales;f_Defluviitaleaceae;g_Defluviitalea                    | 0 | 0 | 0 | 5.95793 | 6.77480 | 2.91006 | 0.00099 | 0.042583 |
|                                                                                                             |   |   |   | 1876356 | 5707964 | 9953618 | 9000999 | 3361015  |
|                                                                                                             |   |   |   | 31e-05  | 49e-09  | 92e-05  | 000999  | 169      |
| k_Bacteria;p_Firmicutes;c_Clostridia;o_Clostridiales;f_Gracilibacteraceae;g_Lutispora                       | 0 | 0 | 0 | 3.14542 | 3.08972 | 1.96523 | 0.00099 | 0.042583 |
|                                                                                                             |   |   |   | 6180185 | 8448120 | 8041599 | 9000999 | 3361015  |
|                                                                                                             |   |   |   | 78e-05  | 71e-09  | 77e-05  | 000999  | 169      |
| k_Bacteria;p_Firmicutes;c_Clostridia;o_Clostridiales;f_Family_XI;g_Tissierella                              | 0 | 0 | 0 | 4.30656 | 4.60262 | 2.39859 | 0.00099 | 0.042583 |
|                                                                                                             |   |   |   | 7039175 | 1411685 | 8916994 | 9000999 | 3361015  |
|                                                                                                             |   |   |   | 88e-05  | 97e-09  | 56e-05  | 000999  | 169      |
| k_Bacteria;p_Firmicutes;c_Bacilli;o_Bacillales;f_Paenibacillaceae;g_Thermobacillus                          | 0 | 0 | 0 | 6.64610 | 1.20209 | 3.87635 | 0.00099 | 0.042583 |
|                                                                                                             |   |   |   | 0884370 | 3240247 | 9826318 | 9000999 | 3361015  |
|                                                                                                             |   |   |   | 91e-05  | 93e-08  | 91e-05  | 000999  | 169      |
| k_Bacteria;p_Firmicutes;c_Clostridia;o_Clostridiales;f_Clostridiaceae_2;g_Alkaliphilus                      | 0 | 0 | 0 | 3.23574 | 3.59372 | 2.11947 | 0.00099 | 0.042583 |
|                                                                                                             |   |   |   | 8874520 | 3697753 | 0363602 | 9000999 | 3361015  |
|                                                                                                             |   |   |   | 02e-05  | 05e-09  | 97e-05  | 000999  | 169      |
| k_Bacteria;p_Proteobacteria;c_Gammaproteobacteria;o_Chromatiales;f_Ectothiorhodospiraceae;g_Thioalkalispira | 0 | 0 | 0 | 4.63238 | 8.37227 | 3.23501 | 0.00099 | 0.042583 |
|                                                                                                             |   |   |   | 3901403 | 1186270 | 7617083 | 9000999 | 3361015  |
|                                                                                                             |   |   |   | 33e-05  | 01e-09  | 02e-05  | 000999  | 169      |

|                                                                                                                    |   |   |   |         |         |         |         |          |
|--------------------------------------------------------------------------------------------------------------------|---|---|---|---------|---------|---------|---------|----------|
| k_Bacteria;p_Actinobacteria;c_Nitriliruptoria;o_Nitriliruptorales;f_Nitriliruptoraceae;g_Nitriliruptor             | 0 | 0 | 0 | 6.63489 | 3.07339 | 6.19818 | 0.00099 | 0.042583 |
|                                                                                                                    |   |   |   | 1010493 | 8585932 | 3792383 | 9000999 | 3361015  |
|                                                                                                                    |   |   |   | 64e-05  | 88e-08  | 14e-05  | 000999  | 169      |
| k_Bacteria;p_Firmicutes;c_Clostridia;o_Clostridiales;f_Family_XI;g_Peptoniphilus                                   | 0 | 0 | 0 | 4.89008 | 5.70979 | 2.67156 | 0.00099 | 0.042583 |
|                                                                                                                    |   |   |   | 4369265 | 7074600 | 2528418 | 9000999 | 3361015  |
|                                                                                                                    |   |   |   | 02e-05  | 99e-09  | 76e-05  | 000999  | 169      |
| k_Bacteria;p_Firmicutes;c_Clostridia;o_Clostridiales;f_Ruminococcaceae;s_bacterium_enrichment_culture_clone_LDC-11 | 0 | 0 | 0 | 3.12512 | 2.45367 | 1.75131 | 0.00099 | 0.042583 |
|                                                                                                                    |   |   |   | 9169331 | 2368547 | 1069080 | 9000999 | 3361015  |
|                                                                                                                    |   |   |   | 67e-05  | 36e-09  | 59e-05  | 000999  | 169      |
| k_Bacteria;p_Firmicutes;c_Clostridia;o_Clostridiales;f_vadinBB60;g_Clostridiales_bacterium_JN18_A56_K              | 0 | 0 | 0 | 4.37050 | 4.85577 | 2.46368 | 0.00099 | 0.042583 |
|                                                                                                                    |   |   |   | 2955377 | 9467436 | 1053686 | 9000999 | 3361015  |
|                                                                                                                    |   |   |   | 48e-05  | 74e-09  | 93e-05  | 000999  | 169      |
| k_Bacteria;p_Actinobacteria;c_Actinobacteria;o_Actinomycetales;f_Actinomycetaceae;g_Actinomyces                    | 0 | 0 | 0 | 4.68701 | 1.46808 | 4.28381 | 0.00099 | 0.042583 |
|                                                                                                                    |   |   |   | 0255913 | 7867258 | 8196508 | 9000999 | 3361015  |
|                                                                                                                    |   |   |   | 7e-05   | 93e-08  | 42e-05  | 000999  | 169      |
| k_Bacteria;p_Proteobacteria;c_Epsilonproteobacteria;o_Epsilonproteobacteria;f_Synergistaceae;g_Synergista          | 0 | 0 | 0 | 5.22340 | 1.05484 | 3.63120 | 0.00099 | 0.042583 |

---

|                                               |   |   |   |         |         |         |         |          |
|-----------------------------------------------|---|---|---|---------|---------|---------|---------|----------|
| obacteria;o__Campylobacteriales;f__Helicobac  |   |   |   | 1874468 | 9674793 | 1032015 | 9000999 | 3361015  |
| teraceae;g__Wolinella                         |   |   |   | 48e-05  | 01e-08  | 81e-05  | 000999  | 169      |
| k__Bacteria;p__Proteobacteria;c__Gammaprot    | 0 | 0 | 0 | 3.70115 | 8.51763 | 3.26298 | 0.00099 | 0.042583 |
| eobacteria;o__Enterobacteriales;f__Enterobact |   |   |   | 2596513 | 5540941 | 0911096 | 9000999 | 3361015  |
| eriaceae;g__Morganella                        |   |   |   | 32e-05  | 65e-09  | 03e-05  | 000999  | 169      |
| k__Bacteria;p__Proteobacteria;c__Gammaprot    | 0 | 0 | 0 | 3.83664 | 9.30227 | 3.40996 | 0.00099 | 0.042583 |
| eobacteria;o__Xanthomonadales;f__Nevskiace    |   |   |   | 0071839 | 6266569 | 2658624 | 9000999 | 3361015  |
| ae;g__Nevskia                                 |   |   |   | 64e-05  | 34e-09  | 24e-05  | 000999  | 169      |

---
