# Supplementary material for: Role of colonic microbiota in the pathogenesis of ulcerative colitis
Source: Springer Nature journal article supplement (doi:10.1186/s12876-019-0930-3), 2019-01-14
Supplement: MOESM2 [file 16396282]

Supplementary file 2. CO-MO (Species level) Metastat analysis

| Taxa                                                                                                                                                 | mean.<br>CO.               | varianc<br>e.CO.           | standar<br>d.error.<br>CO. | mean.<br>MO.               | varianc<br>e.MO.           | standar<br>d.error.<br>MO. | p.value                    | q.v<br>alu<br>e            |
|------------------------------------------------------------------------------------------------------------------------------------------------------|----------------------------|----------------------------|----------------------------|----------------------------|----------------------------|----------------------------|----------------------------|----------------------------|
| k_Bacteria;p_Firmicutes;c_Clostridia;o_Clostridiales;<br>f_Lachnospiraceae;g_Blautia;s_Clostridiales_bacteri<br>um_VE202-06                          | 0.0297<br>006558<br>205442 | 0.0003<br>949325<br>954371 | 0.0062<br>843662<br>802003 | 0.1332<br>102314<br>40598  | 0.0019<br>414146<br>574876 | 0.0155<br>780882<br>070284 | 0.0009<br>990009<br>990009 | 0.03505<br>079487<br>35694 |
| k_Bacteria;p_Firmicutes;c_Erysipelotrichia;o_Erysip<br>elotrichales;f_Erysipelotrichaceae;g_Incertae_Sedis;s_<br>_Erysipelotrichaceae_bacterium_21_3 | 0.0082<br>590667<br>207132 | 5.4705<br>978595<br>7856e- | 0.0023<br>389309<br>223614 | 0.0862<br>306632<br>4482   | 0.0010<br>032582<br>641788 | 0.0111<br>985393<br>25392  | 0.0009<br>990009<br>990009 | 0.03505<br>079487<br>35694 |
| k_Bacteria;p_Firmicutes;c_Clostridia;o_Clostridiales<br>;f_Ruminococcaceae;g_Anaerotruncus;s_Anaerotru<br>ncus_sp_G32012                             | 0.3733<br>020827<br>11393  | 0.0120<br>594424<br>337851 | 0.0347<br>267079<br>260115 | 0.0254<br>402509<br>629312 | 0.0010<br>769471<br>887408 | 0.0116<br>025169<br>076628 | 0.0009<br>990009<br>990009 | 0.03505<br>079487<br>35694 |
| k_Bacteria;p_Firmicutes;c_Bacilli;o_Lactobacillales;f<br>_Lactobacillaceae;g_Lactobacillus;s_mouse_gut_me<br>tagenome                                | 0.1620<br>469019<br>82967  | 0.0147<br>450566<br>12961  | 0.0383<br>992924<br>582746 | 0.0446<br>345074<br>8912   | 0.0006<br>034182<br>769860 | 0.0086<br>848882<br>90776  | 0.0009<br>990009<br>990009 | 0.03505<br>079487<br>35694 |
| k_Bacteria;p_Firmicutes;c_Bacilli;o_Bacillales;f_Sta<br>phylococcaceae;g_Staphylococcus;s_Staphylococcus<br>_sp_SV3                                  | 0.0013<br>787245<br>837214 | 5.4233<br>695079<br>1425e- | 0.0007<br>364352<br>997999 | 0.0003<br>194477<br>024526 | 4.4403<br>088434<br>7641e- | 0.0002<br>355925<br>731924 | 0.0014<br>907850<br>854524 | 0.04922<br>866393<br>69432 |

|                                                       |   |    |    |        |        |        |        |         |
|-------------------------------------------------------|---|----|----|--------|--------|--------|--------|---------|
|                                                       | 2 | 06 | 39 | 29     | 07     | 82     | 8      |         |
| k_Bacteria;p_Firmicutes;c_Clostridia;o_Clostridiales  | 0 | 0  | 0  | 0.0047 | 6.0596 | 0.0027 | 0.0009 | 0.03505 |
| ;f_Clostridiaceae_1;g_Clostridium_sensu_stricto_1;s_  |   |    |    | 265284 | 278816 | 521872 | 990009 | 079487  |
| Clostridium_butyricum                                 |   |    |    | 095966 | 8386e- | 850707 | 990009 | 35694   |
|                                                       |   |    |    | 9      | 05     |        | 99     |         |
| k_Bacteria;p_Actinobacteria;c_Actinobacteria;o_Bifi   | 0 | 0  | 0  | 0.0184 | 0.0025 | 0.0177 | 0.0009 | 0.03505 |
| dobacteriales;f_Bifidobacteriaceae;g_Gardnerella;s_   |   |    |    | 339298 | 179395 | 409822 | 990009 | 079487  |
| Gardnerella_vaginalis_0288E                           |   |    |    | 455473 | 982262 | 100775 | 990009 | 35694   |
|                                                       |   |    |    |        | 8      |        | 99     |         |
| k_Bacteria;p_Firmicutes;c_Bacilli;o_Bacillales;f_Baci | 0 | 0  | 0  | 0.0022 | 1.1635 | 0.0012 | 0.0009 | 0.03505 |
| llaceae;g_Bacillus;s_Bacillus_coagulans               |   |    |    | 876146 | 285508 | 059895 | 990009 | 079487  |
|                                                       |   |    |    | 406336 | 6545e- | 059998 | 990009 | 35694   |
|                                                       |   |    |    | 6      | 05     | 7      | 99     |         |
| k_Bacteria;p_Firmicutes;c_Bacilli;o_Lactobacillales;f | 0 | 0  | 0  | 0.0018 | 9.4782 | 0.0010 | 0.0009 | 0.03505 |
| _Lactobacillaceae;g_Lactobacillus;s_Lactobacillus_s   |   |    |    | 885411 | 988334 | 884793 | 990009 | 079487  |
| p._EMML_3041                                          |   |    |    | 624956 | 7759e- | 770139 | 990009 | 35694   |
|                                                       |   |    |    |        | 06     | 6      | 99     |         |
| k_Bacteria;p_Proteobacteria;c_Gammaproteobacter       | 0 | 0  | 0  | 0.0049 | 5.8500 | 0.0027 | 0.0009 | 0.03505 |
| ia;o_Pseudomonadales;f_Moraxellaceae;g_Acinet         |   |    |    | 386482 | 757666 | 041809 | 990009 | 079487  |
| bacter;s_Acinetobacter_calcoaceticus                  |   |    |    | 725421 | 832e-  | 681221 | 990009 | 35694   |
|                                                       |   |    |    | 1      | 05     | 4      | 99     |         |
| k_Bacteria;p_Bacteroidetes;c_Bacteroidia;o_Bacter     | 0 | 0  | 0  | 0.0039 | 8.1057 | 0.0031 | 0.0009 | 0.03505 |
| oidales;f_Prevotellaceae;g_Prevotella;s_Prevotella_b  |   |    |    | 066130 | 743142 | 831144 | 990009 | 079487  |
| ivia                                                  |   |    |    | 833885 | 5383e- | 957128 | 990009 | 35694   |
|                                                       |   |    |    | 5      | 05     | 5      | 99     |         |

|                                                                                                                                                                  |   |   |   |                                  |                                  |                                  |                                  |                            |
|------------------------------------------------------------------------------------------------------------------------------------------------------------------|---|---|---|----------------------------------|----------------------------------|----------------------------------|----------------------------------|----------------------------|
| k_Bacteria;p_Firmicutes;c_Clostridia;o_Clostridiales;<br>f_Clostridiaceae_1;g_Clostridium_sensu_stricto_6;s_<br>Clostridium_sp._M2_40                            | 0 | 0 | 0 | 0.0009<br>669075<br>438176<br>45 | 1.8543<br>958619<br>5214e-<br>06 | 0.0004<br>814555<br>875093<br>95 | 0.0009<br>990009<br>990009<br>99 | 0.03505<br>079487<br>35694 |
| k_Bacteria;p_Firmicutes;c_Bacilli;o_Bacillales;f_Pae<br>nibacillaceae;g_Thermobacillus;s_Thermobacillus_co<br>mposti_KWC4                                        | 0 | 0 | 0 | 0.0011<br>283422<br>121477<br>7  | 4.4731<br>992287<br>3044e-<br>06 | 0.0007<br>477632<br>670780<br>94 | 0.0009<br>990009<br>990009<br>99 | 0.03505<br>079487<br>35694 |
| k_Bacteria;p_Firmicutes;c_Bacilli;o_Lactobacillales;f_<br>_Lactobacillaceae;g_Lactobacillus;s_Lactobacillus_pl<br>antarum                                        | 0 | 0 | 0 | 0.0009<br>188239<br>978885<br>86 | 4.7694<br>885288<br>0136e-<br>06 | 0.0007<br>721308<br>607355<br>17 | 0.0009<br>990009<br>990009<br>99 | 0.03505<br>079487<br>35694 |
| k_Bacteria;p_Proteobacteria;c_Epsilonproteobacteri<br>a;o_Campylobacteriales;f_Helicobacteraceae;g_Woli<br>nella;s_Wolinella_succinogenes                        | 0 | 0 | 0 | 0.0005<br>189914<br>851385<br>94 | 8.3797<br>076976<br>1856e-<br>07 | 0.0003<br>236454<br>019760<br>39 | 0.0009<br>990009<br>990009<br>99 | 0.03505<br>079487<br>35694 |
| k_Bacteria;p_Firmicutes;c_Bacilli;o_Bacillales;f_Pae<br>nibacillaceae;g_Paenibacillus;s_Bacillus_sp._DB10320<br>10                                               | 0 | 0 | 0 | 0.0006<br>701439<br>954522<br>89 | 1.2586<br>859185<br>7098e-<br>06 | 0.0003<br>966556<br>943009<br>55 | 0.0009<br>990009<br>990009<br>99 | 0.03505<br>079487<br>35694 |
| k_Bacteria;p_Proteobacteria;c_Gammaproteobacter<br>ia;o_Enterobacteriales;f_Enterobacteriaceae;g_Arse<br>nophonus;s_secondary_endosymbiont_of_Bemisia_ta<br>baci | 0 | 0 | 0 | 0.0013<br>333333<br>333333<br>3  | 1.4222<br>222222<br>2222e-<br>05 | 0.0013<br>333333<br>333333<br>3  | 0.0009<br>990009<br>990009<br>99 | 0.03505<br>079487<br>35694 |
